# Supplementary material for: Clinical Characterization of Patients With Autosomal Dominant Short Stature due to Aggrecan Mutations
Source: Oxford University Press journal article supplement (doi:10.1210/jc.2016-3313), 2016-11-21

**Supplemental Table 1: ACAN clinical data form**

| <b>Name:</b>                                | <b>DOB:</b> | <b>Age:</b> |
|---------------------------------------------|-------------|-------------|
| Gestational age (weeks + days)              |             |             |
| Birth weight (kg)                           |             |             |
| Birth length (cm)                           |             |             |
| Birth head circumference (cm)               |             |             |
| <b>FHx (each family member)</b>             |             |             |
| Recent weight (kg) [measured]               |             |             |
| Recent height (cm) [measured]               |             |             |
| Puberty (age Menarche? Early/late/average?) |             |             |
| Age at growth cessation?                    |             |             |
| Joint disease? Back problems? Surgeries?    |             |             |
| <b>Physical examination</b>                 |             |             |
| <b>Growth chart (Y/N)?</b>                  |             |             |
| <b>Current Measurements</b>                 |             |             |
| Weight                                      |             |             |
| Height                                      |             |             |
| Head circumference                          |             |             |
| Arm span                                    |             |             |
| Sitting height                              |             |             |
| Upper arm, forearm length                   |             |             |
| Hand length                                 |             |             |
| <b>Craniofacial features</b>                |             |             |
| Flat nasal bridge                           |             |             |
| Midface hypoplasia                          |             |             |
| Prognathism                                 |             |             |
| Dental development                          |             |             |
| Other dental abnormalities                  |             |             |
| <b>Hands</b>                                |             |             |
| Brachydactyly (short hands)                 |             |             |
| Short thumbs                                |             |             |
| Camptodactyly                               |             |             |
| Short metacarpals? Other?                   |             |             |
| <b>Skeletal manifestations</b>              |             |             |
| Exaggerated lumbar lordosis                 |             |             |
| Other                                       |             |             |
| <b>Puberty</b>                              |             |             |
| Tanner stage                                |             |             |
| Gynecomastia                                |             |             |
| <b>Radiology</b>                            |             |             |
| Bone age x-ray                              |             |             |
| Skeletal survey                             |             |             |
| <b>Patient photos</b>                       |             |             |
| Face, front & side                          |             |             |
| Whole body front & side                     |             |             |
| Hands & feet                                |             |             |
| Comments:                                   |             |             |

**Supplemental Table 2: Genetic details of the ACAN variants including in silico analysis of the ACAN missense variants.**

| Family | cDNA                | Exon/<br>Intron | Amino acid        | GerpN | CADD<br>V1.3 | SIFT       | Polyphen            | Mutation<br>Taster | Splicing<br>prediction                                                        | Frequency<br>in ExAc |
|--------|---------------------|-----------------|-------------------|-------|--------------|------------|---------------------|--------------------|-------------------------------------------------------------------------------|----------------------|
| 18     | c.61G>T             | 2               | p.Glu21*          | -     | -            | -          | -                   | -                  | -                                                                             | Absent               |
| 12     | c.223T>C            | 3               | p.Trp75Arg        | 5.36  | 23.5         | Del<br>(0) | Prob dam<br>(1.0)   | Dis caus<br>(1.0)  | -                                                                             | Absent               |
| 1      | c.272delA           | 3               | p.Arg93Alafs*41   | -     | -            | -          | -                   | -                  | -                                                                             | Absent               |
| 20     | c.492C>G            | 4               | p.Tyr164*         | -     | -            | -          | -                   | -                  | -                                                                             | Absent               |
| 10     | c.532A>T            | 4               | p.Asn178Tyr       | 5.79  | 23.8         | Del<br>(0) | Prob dam<br>(1.0)   | Dis caus<br>(1.0)  | -                                                                             | Absent               |
| 16     | c.903G>C            | 6               | p.Trp301Cys       | 5.56  | 24.7         | Del<br>(0) | Prob dam<br>(1.0)   | Dis caus<br>(1.0)  | -                                                                             | Absent               |
| 15     | c.916A>T            | 6               | p.Ser306Cys       | 5.56  | 23.5         | Del<br>(0) | Prob dam<br>(1.0)   | Dis caus<br>(1.0)  | -                                                                             | Absent               |
| 13     | c.1047_1048delinsAC | 6               | p.Tyr349*         | -     | -            | -          | -                   | -                  | -                                                                             | Absent               |
| 8      | c.1443G>T           | 7               | p.Glu415*         | -     | -            | -          | -                   | -                  | -                                                                             | Absent               |
| 14     | c.1425delA          | 8               | p.Val478Serfs*14  | -     | -            | -          | -                   | -                  | -                                                                             | Absent               |
| 11     | c.1526C>A           | 8               | p.Ser509*         | -     | -            | -          | -                   | -                  | -                                                                             | Absent               |
| 2      | c.2026+1G>A         | int10           | -                 | -     | -            | -          | -                   | -                  | Destroys<br>acceptor<br>site and<br>predicted to<br>cause exon<br>10 skipping | Absent               |
| 9      | c.4657G>T           | 12              | p.Glu1553*        | -     | -            | -          | -                   | -                  | -                                                                             | Absent               |
| 4      | c.5391delG          | 12              | p.Gly1797Glyfs*52 | -     | -            | -          | -                   | -                  | -                                                                             | Absent               |
| 3      | c.7064T>C           | 14              | p.Leu2355Pro      | 5.59  | 31           | Del<br>(0) | Prob dam<br>(1.0)   | Dis caus<br>(1.0)  | -                                                                             | Absent               |
| 7      | c.7153G>A           | 15              | p.Glu2385Lys      | 5.66  | 34           | Del<br>(0) | Prob dam<br>(0.998) | Dis caus<br>(1.0)  | -                                                                             | Absent               |
| 19     | c.7203G>A           | 16              | p.Trp2401*        | -     | -            | -          | -                   | -                  | -                                                                             | Absent               |
| 5,6    | c.7429G>A           | 16              | p.Val2417Met      | 5.26  | 32           | Del<br>(0) | Prob dam<br>(1.0)   | Dis caus<br>(1.0)  | -                                                                             | Absent               |
| 17     | c.7276G>T           | 16              | p.Glu2426*        | -     | -            | -          | -                   | -                  | -                                                                             | Absent               |

The coordinates are according to ACAN transcript NM\_013227.3. SIFT Del = deleterious; Polyphen Prob dam = probably damaging; MutationTaster Dis caus = disease causing; ExAc = Exome aggregation consortium.

## Supplemental Files – ACAN patients Pedigrees

### Supplemental Figure 1.

Pedigrees of families 1 - 20. The arrows indicate the proband. Individuals carrying heterozygous ACAN mutations are indicated by solid symbols while unaffected individuals are indicated as open symbols. Height SD scores are indicated under the individuals.

#### Family 1\_ ACAN Mutation p.Arg93Alafs\*

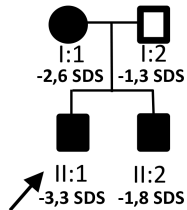

#### Family 2\_ ACAN Mutation c.2026+1 G>A

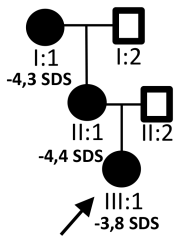

#### Family 3\_ ACAN Mutation p.Leu2355Pro

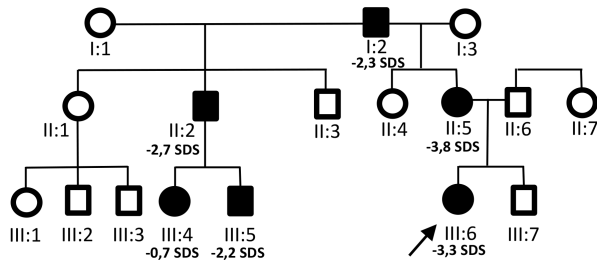

#### Family 4\_ ACAN Mutation p.Gly1797Glyfs\*

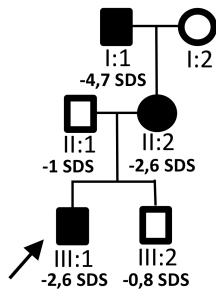

### Family 5\_ACAN Mutation p.Val2417Met

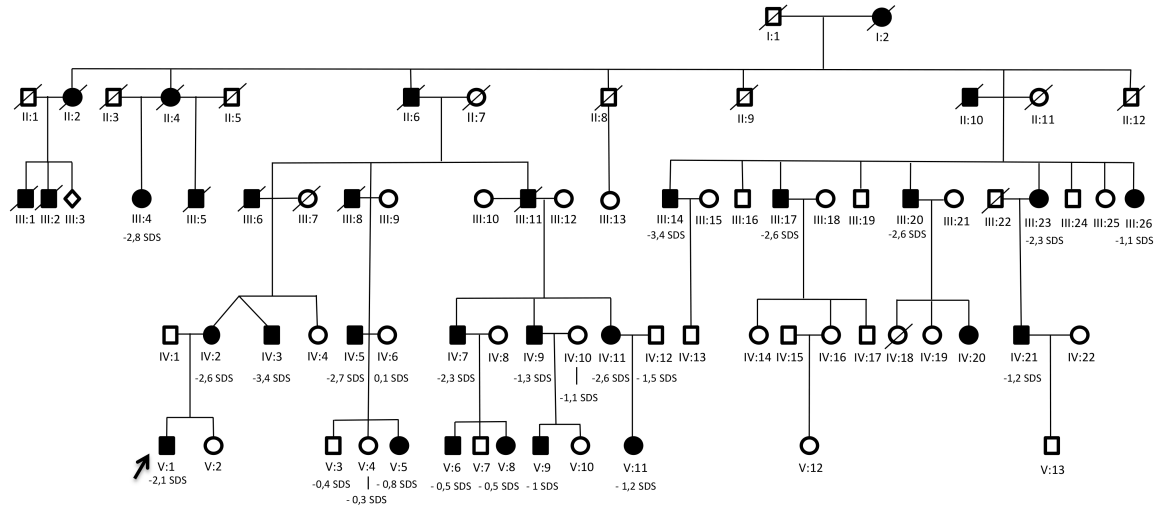

### Family 6\_ACAN Mutation p.Val2417Met

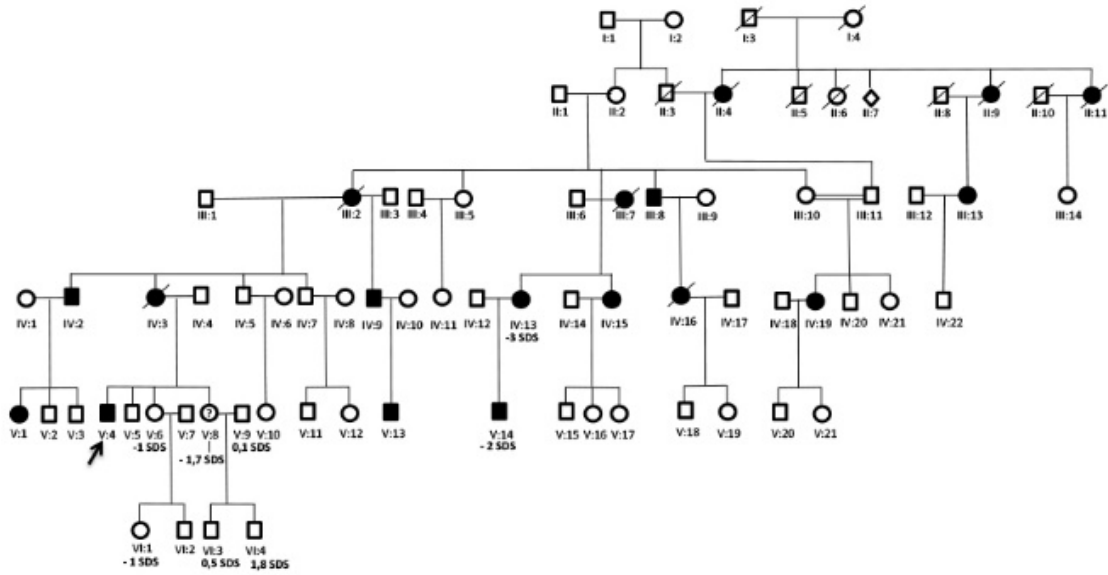

**Family 7\_ ACAN Mutation p.Glu2385Lys**

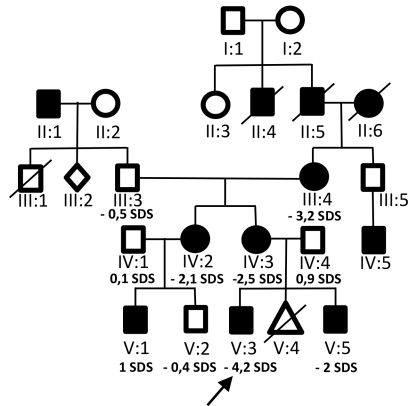

**Family 8\_ ACAN Mutation p.Glu415\***

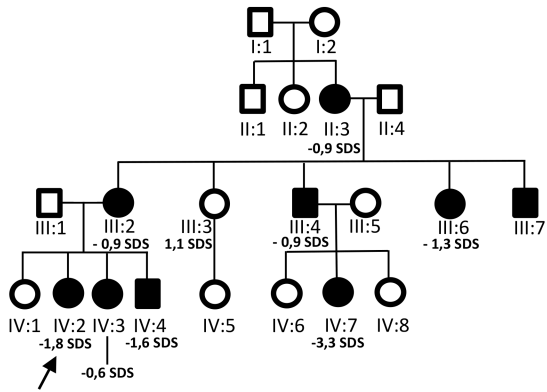

**Family 9\_ ACAN Mutation p.Glu1553\***

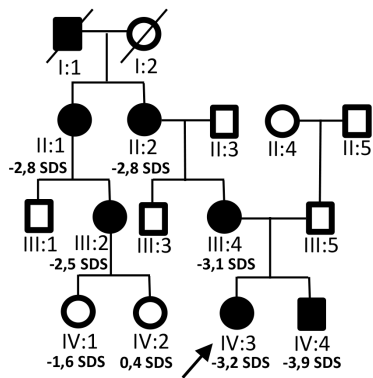

**Family 10\_ ACAN Mutation p.Asn178Tyr**

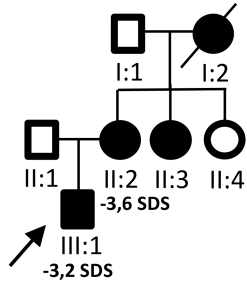

**Family 11\_ ACAN Mutation p.Ser509\***

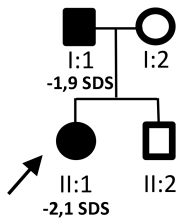

**Family 12\_ ACAN Mutation p.Trp75Arg**

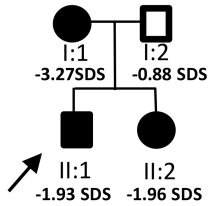

**Family 13\_ ACAN Mutation p.Tyr349\***

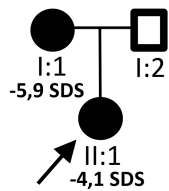

**Family 14\_ ACAN Mutation p.Val478Serfs\***

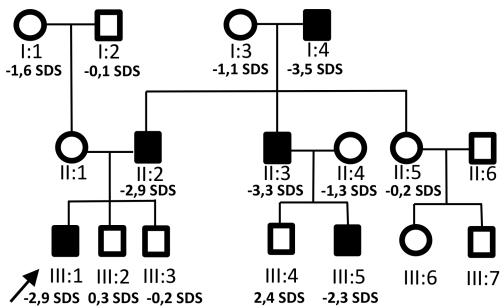

**Family 15\_ACAN Mutation p.Ser306Cys**

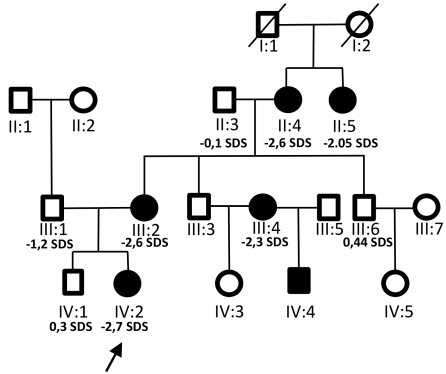

**Family 16\_ACAN Mutation p.Trp301Cys**

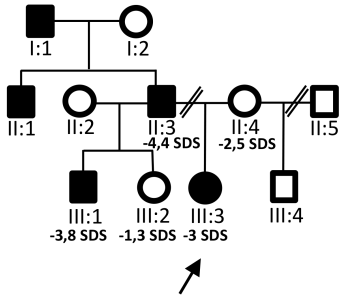

**Family 17\_ACAN Mutation p.Glu2426\***

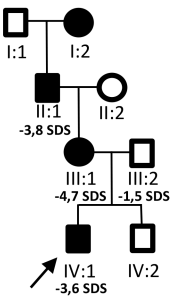

**Family 18\_ACAN Mutation p.Glu21\***

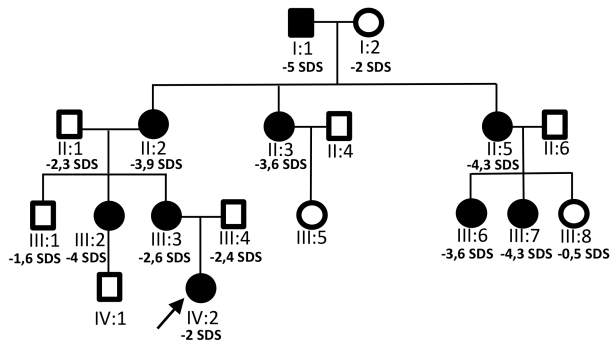

**Family 19\_ ACAN Mutation p.Trp2401\***

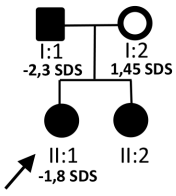

**Family 20\_ ACAN Mutation p.Tyr164\***

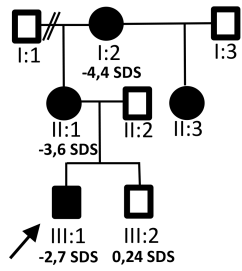



## Supplemental Files – ACAN patients Growth Charts

### Supplemental Figure 2.

Growth (height) charts of individuals with heterozygous *ACAN* mutations. The left end of each arrow represents the subject's chronological age (CA) and height and the right end represents the bone age. Lines indicate periods with GH or GnRH analogue (GnRHa) or GH and GnRHa or GH and aromatase inhibitor letrozole (AI) treatment. Fa, father's height; Mo, mother's height; Asterisk indicates parent carrying the mutation.

#### Family 1\_Patient II-1\_ACAN Mutation p.Arg93Alafs\*\_Male\_GH & AI Treatment

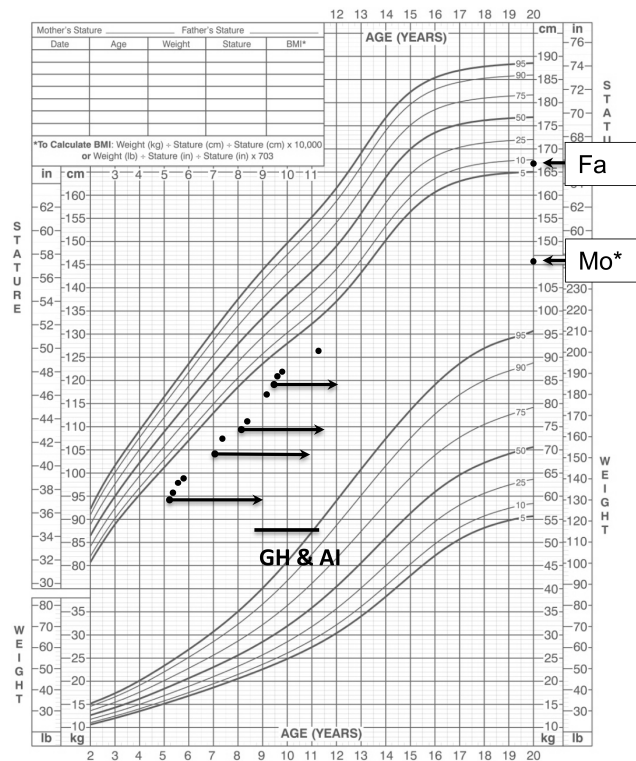

**Family 1\_Patient II-2\_ACAN Mutation p.Arg93Alafs\*\_Male\_GH Treatment**

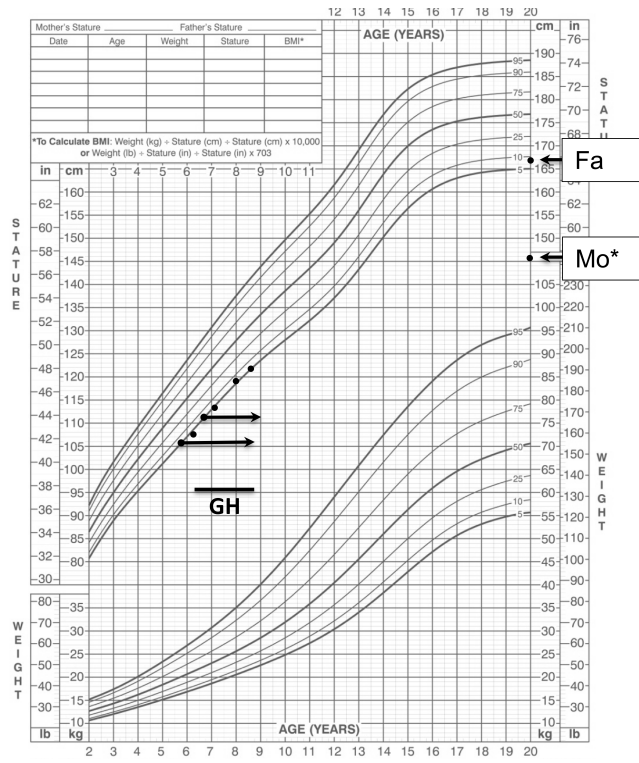

**Family 2\_Patient III-1\_ACAN Mutation c.2026+1 G>A \_Female\_No GH Treatment**

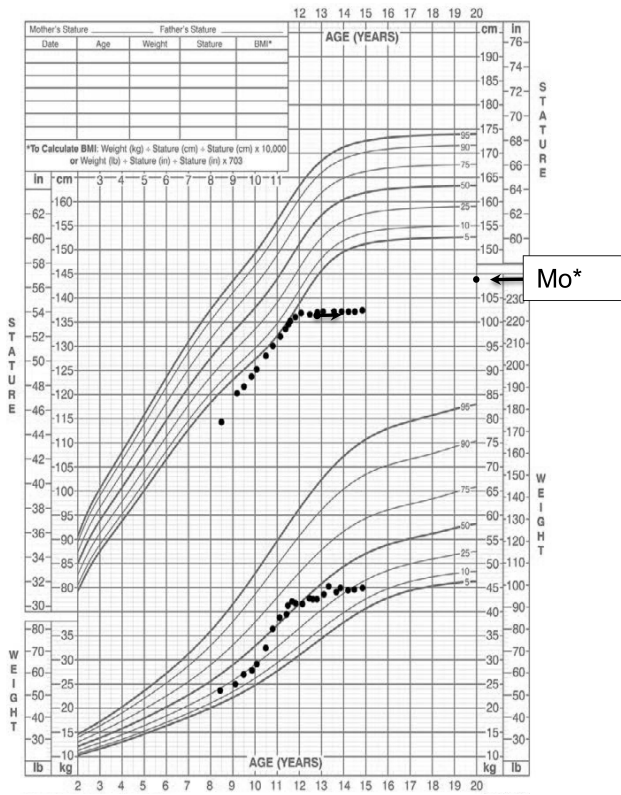

### Family 3\_Patient III-6\_ACAN Mutation p.Leu2355Pro\_Female\_GH & GnRHa Treatment

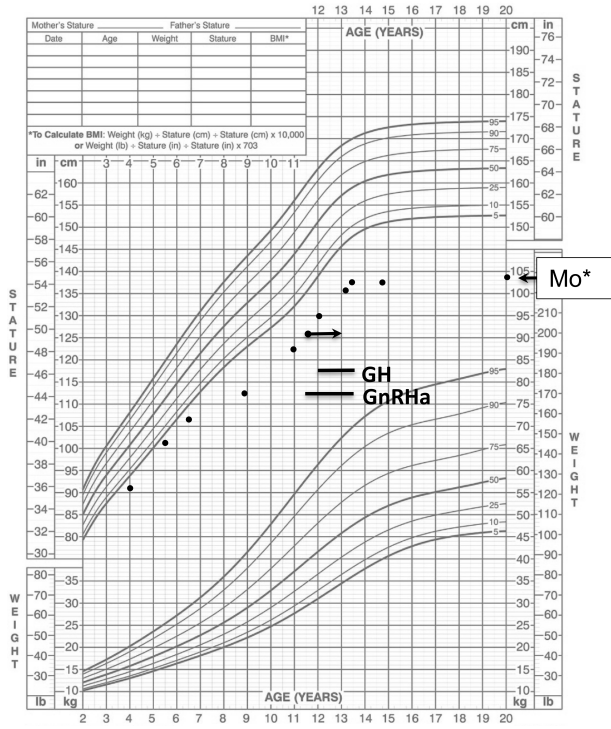

### Family 3\_Patient III-4\_ACAN Mutation p.Leu2355Pro\_Female\_No GH Treatment

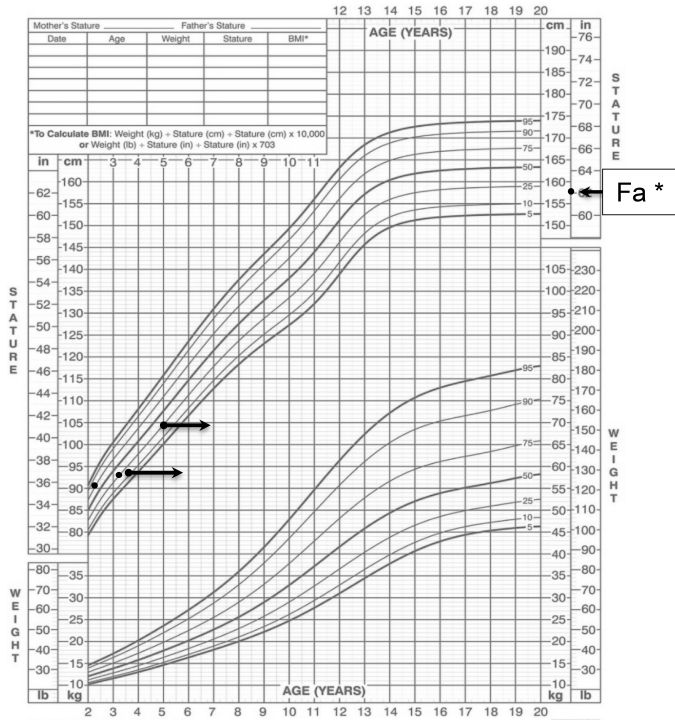



**Family 5\_Patient IV:12\_ACAN Mutation p.Val2417Met\_Female\_No GH Treatment**

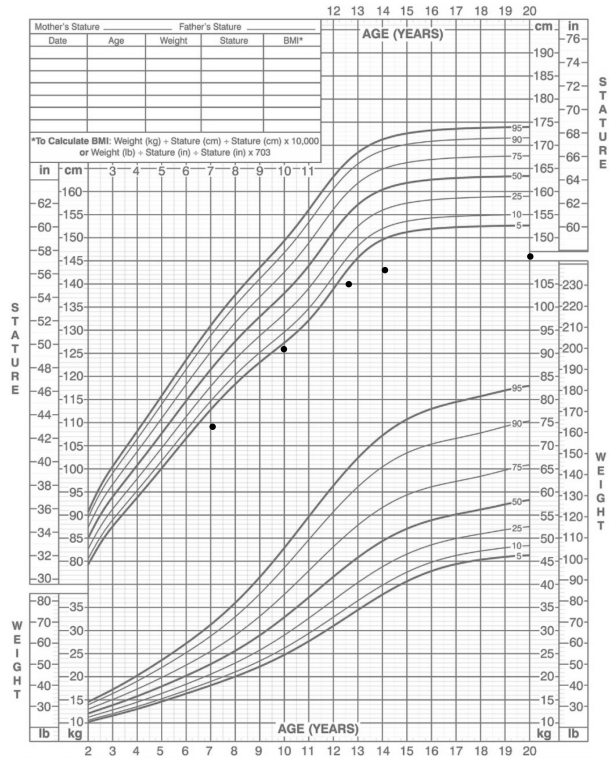

**Family 5\_Patient V:5\_ACAN Mutation p.Val2417Met\_Female\_GH & GnRH Treatment**

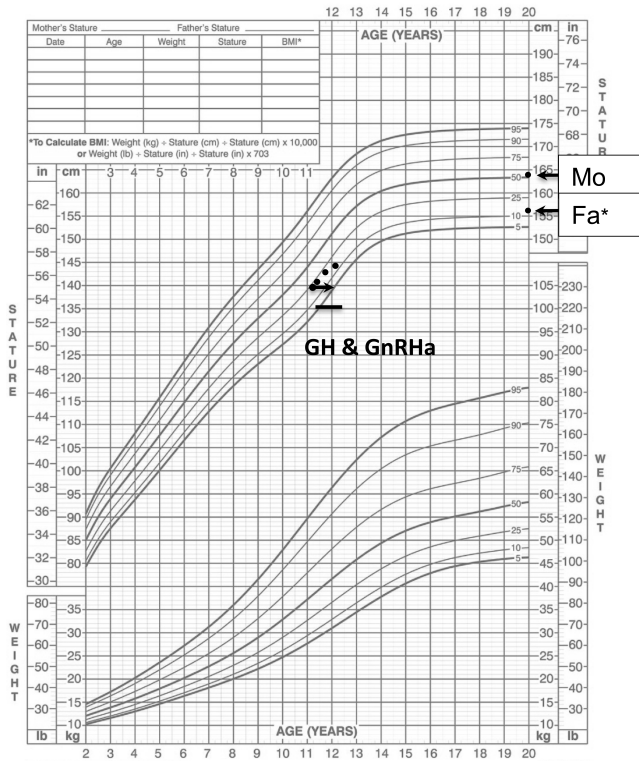

### Family 5\_Patient V:11\_ACAN Mutation p.Val2417Met\_Female\_GH Treatment

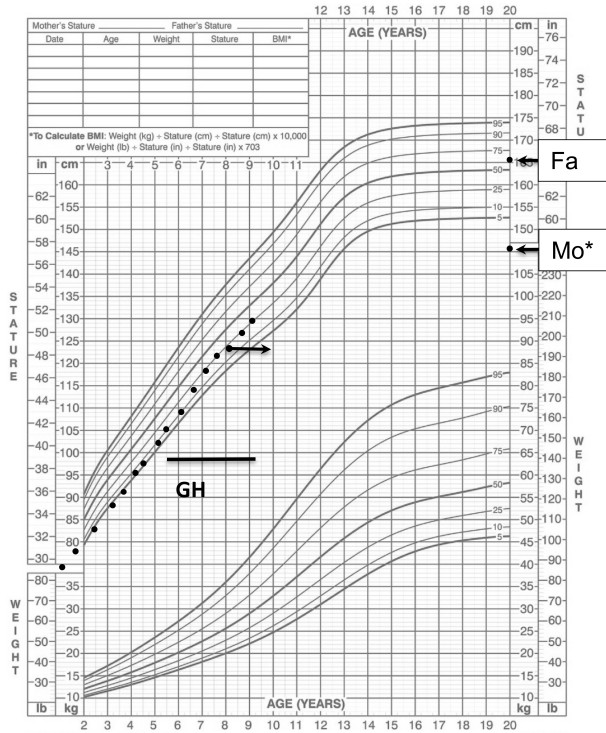

### Family 6\_Patient V:14\_ACAN Mutation p.Val2417Met\_Male\_No GH Treatment

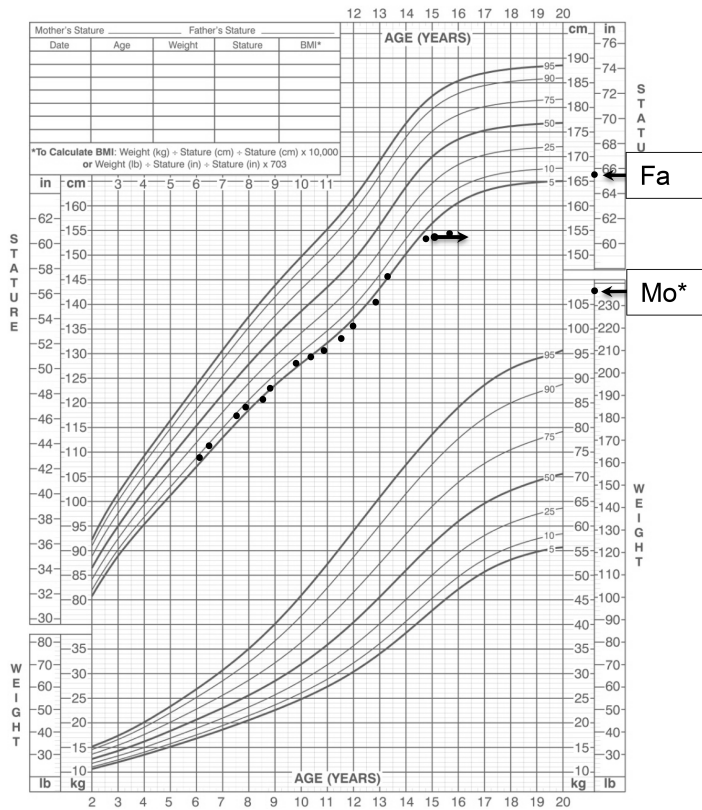

**Family 8\_Patient IV-2\_ACAN Mutation p.Glu415\*\_Female\_GH & GnRHa Treatment**

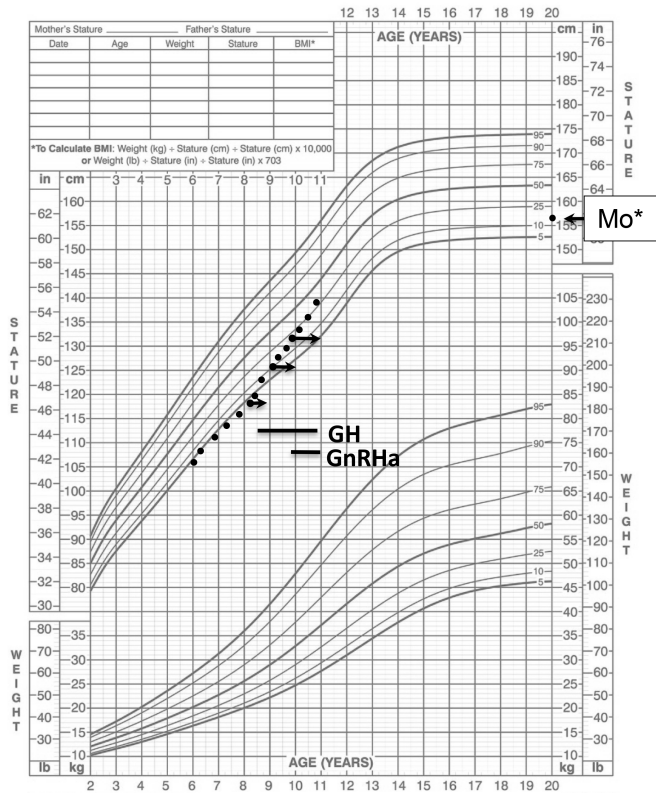

**Family 8\_Patient IV-4\_ACAN Mutation p.Glu415\*\_Male\_GH & GnRHa Treatment**

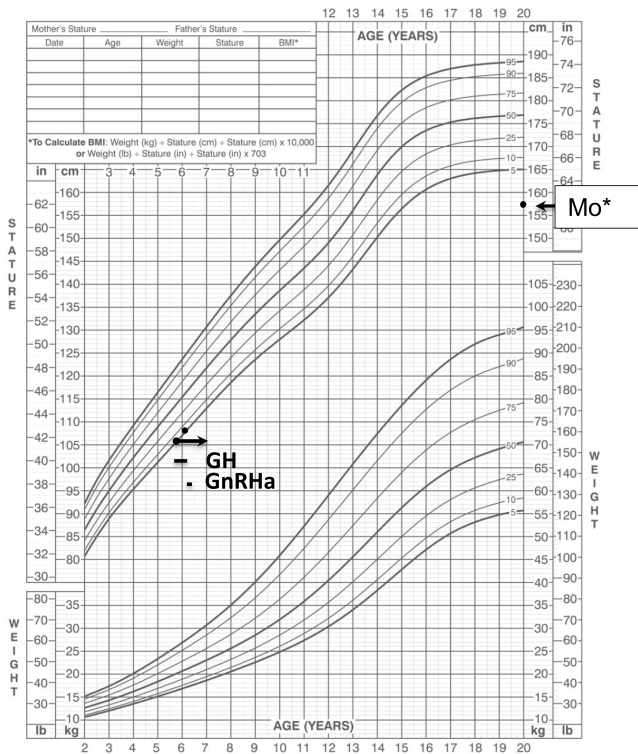

**Family 8\_Patient IV-3\_ACAN Mutation p.Glu415\*\_Female\_GH Treatment**

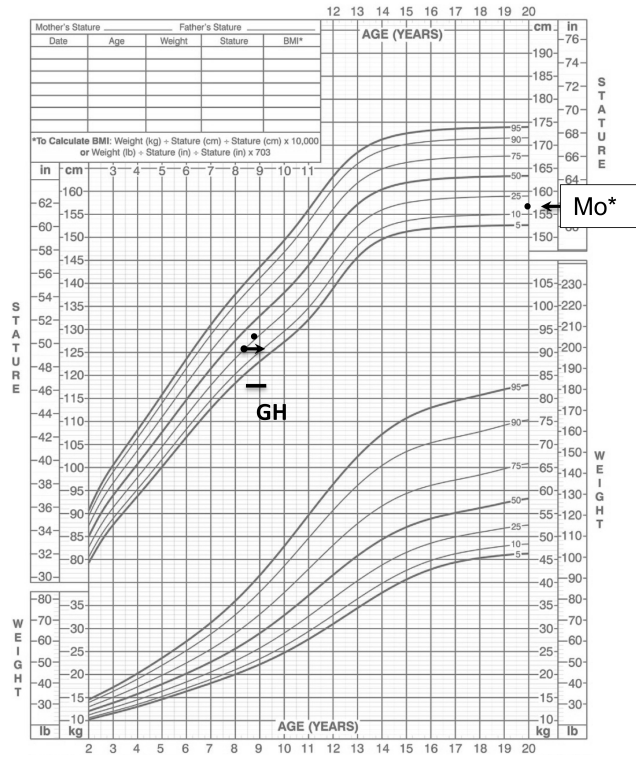

**Family 8\_Patient IV-7\_ACAN Mutation p.Glu415\*\_Female\_GH Treatment**

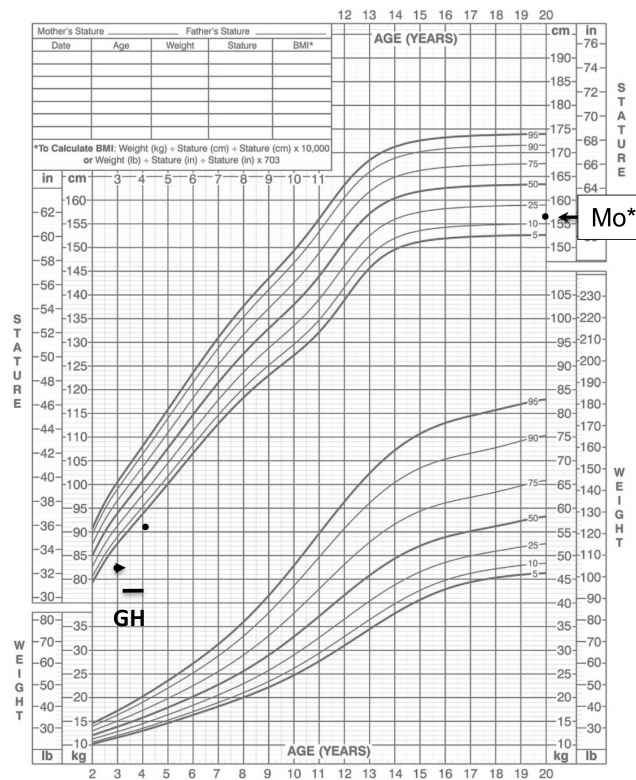



**Family 9\_Patient IV-3\_ACAN Mutation p.Glu1553\*\_Female\_GH Treatment**

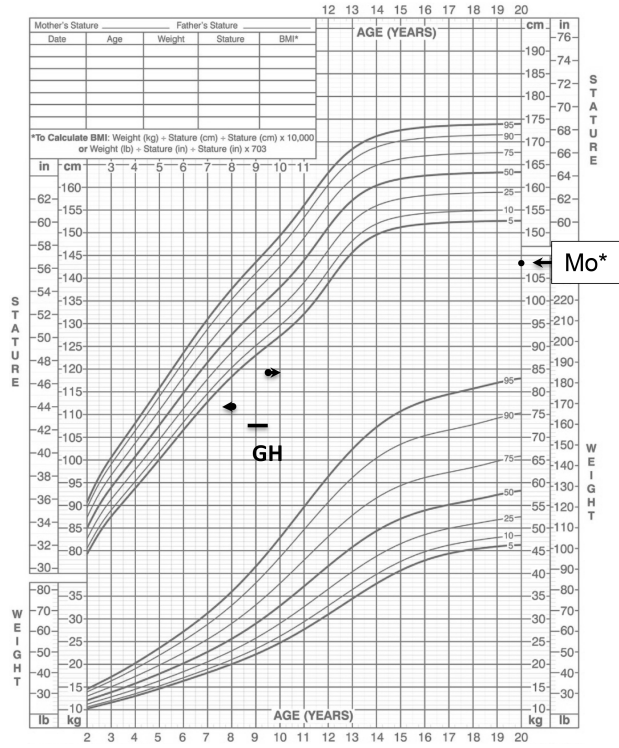

**Family 10\_Patient III-1\_ACAN Mutation p.Asn178Tyr\_Male\_No GH Treatment**

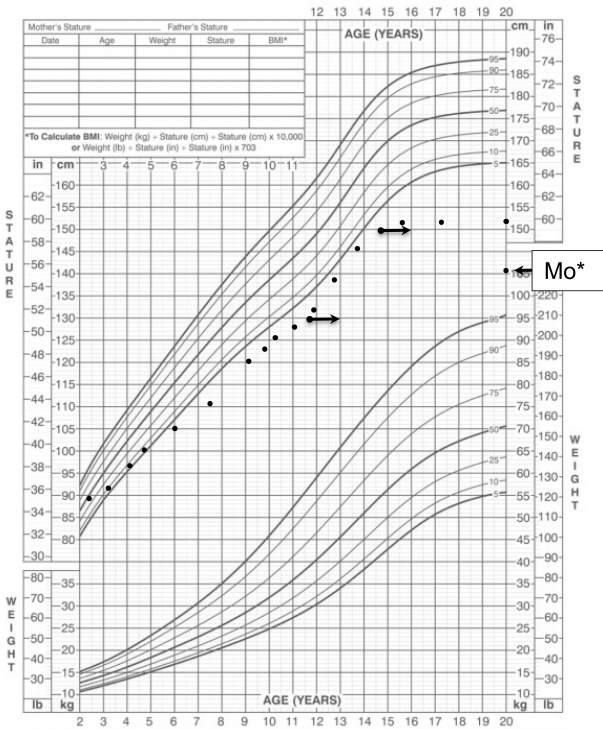

### Family 12\_Patient II-1\_ACAN Mutation p.Trp75Arg\_Male\_GH Treatment

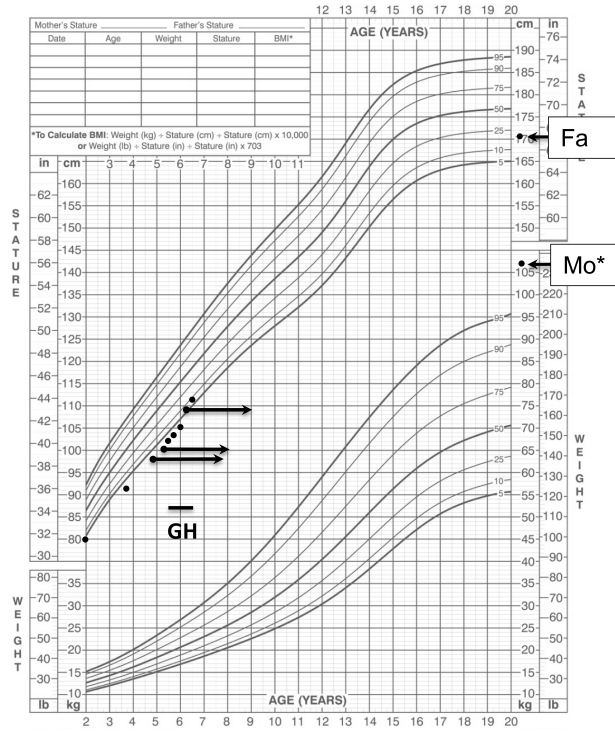

### Family 12\_Patient II-2\_ACAN Mutation p.Trp75Arg\_Female\_GH Treatment

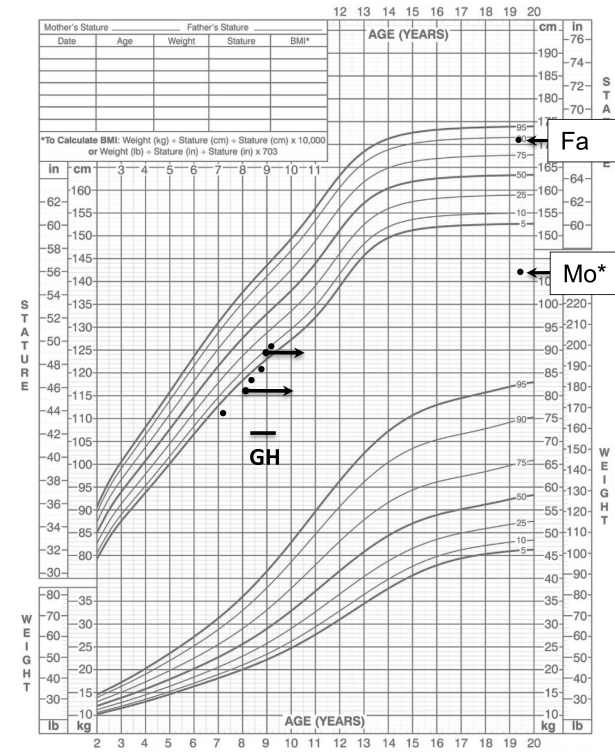

**Family 14\_Patient III-1\_ACAN Mutation p.Val478Serfs\*\_Male\_GH Treatment**

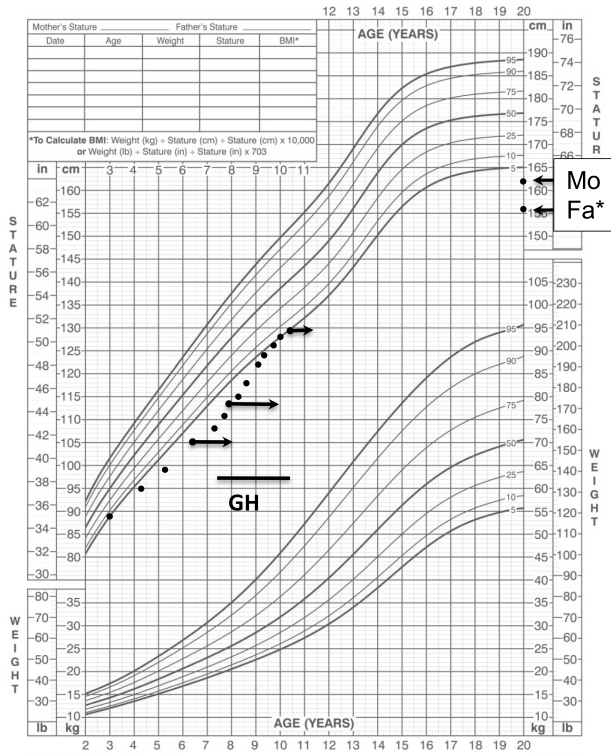

**Family 15\_Patient IV-2\_ACAN Mutation p.Ser306Cys\_Female\_No GH Treatment**

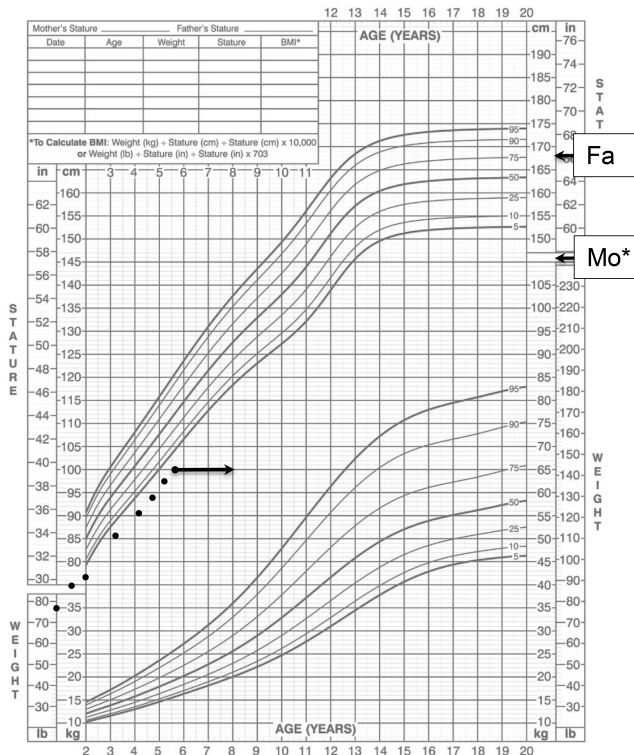

**Family 19\_Patient II-1\_ACAN Mutation p. Trp2401\*\_Female\_No GH Treatment**

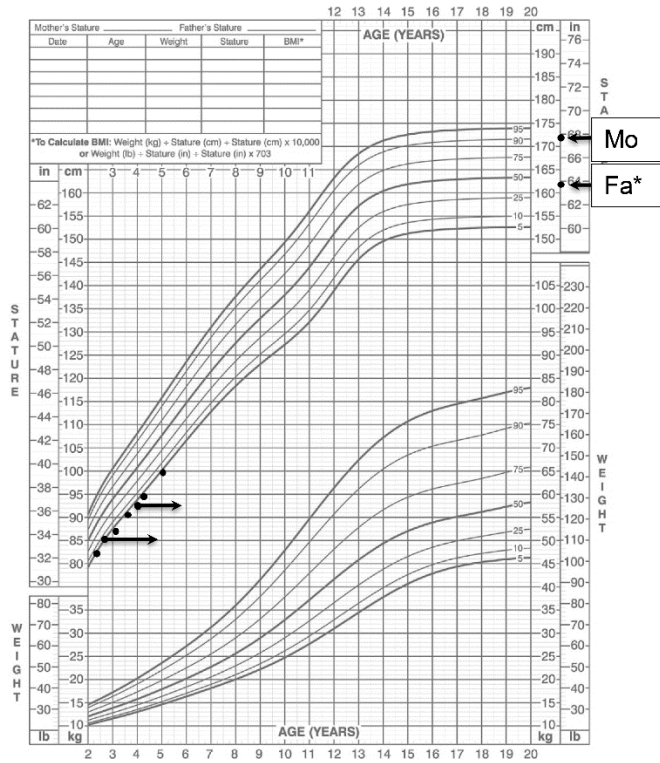

**Family 19\_Patient II-2\_ACAN Mutation p. Trp2401\*\_Female\_No GH Treatment**

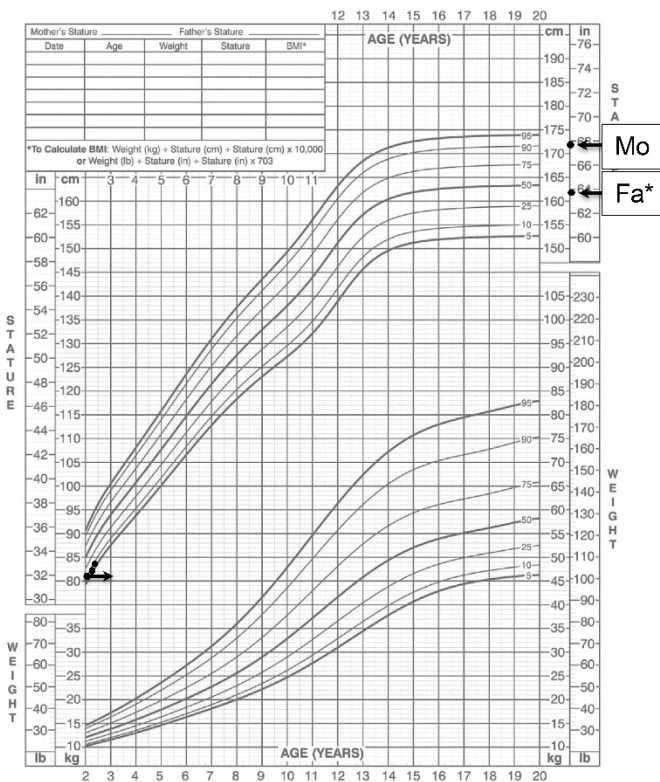

**Supplemental Figure 3.**

Aggrecan patient's photos: A and B) Proband of Family 13 (II:1), Female, *ACAN* mutation p.Tyr349\*; C and D) Proband of Family 9 (IV:4), Male, *ACAN* mutation p.Glu1553\*; E and F) Proband of Family 16 (III:3), Female, *ACAN* mutation p.Trp301Cys and G and H) Proband of Family 8 (IV:4), Male, *ACAN* mutation p.Glu415\*.

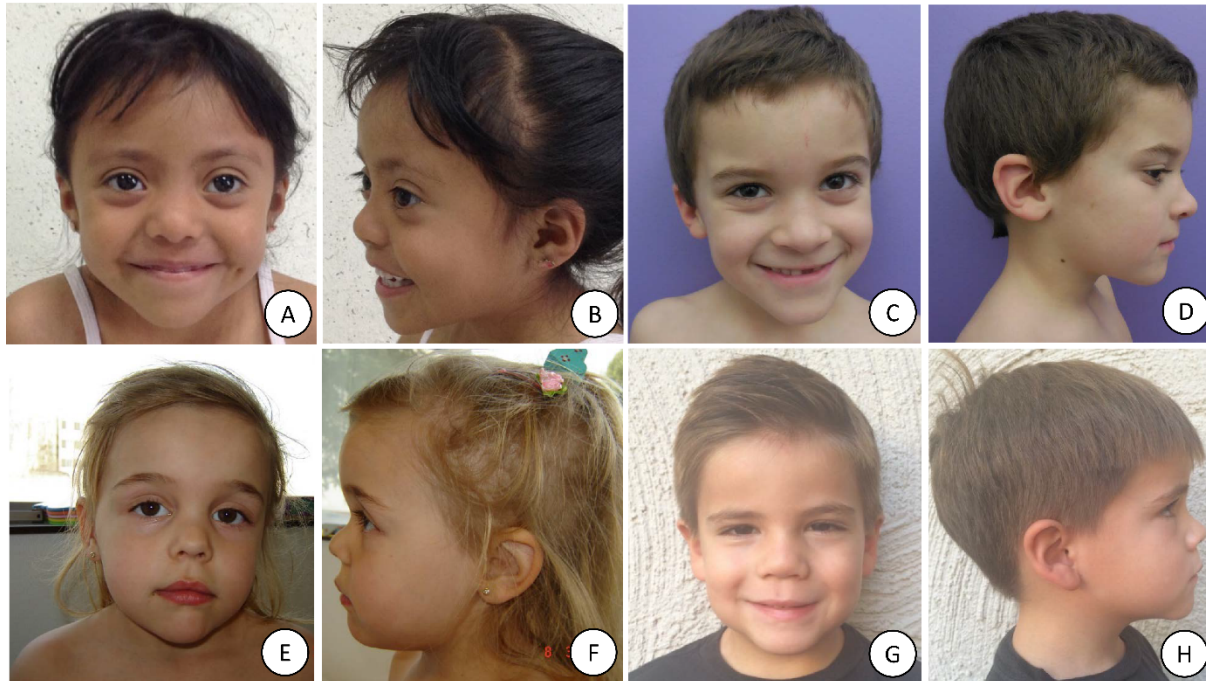

**Supplemental Figure 4.**

Radiographs from skeletal survey of female cousin of Family 3, proband (III:4), *ACAN* mutation p.Leu2355Pro, at the age of 3 years and 7 months.

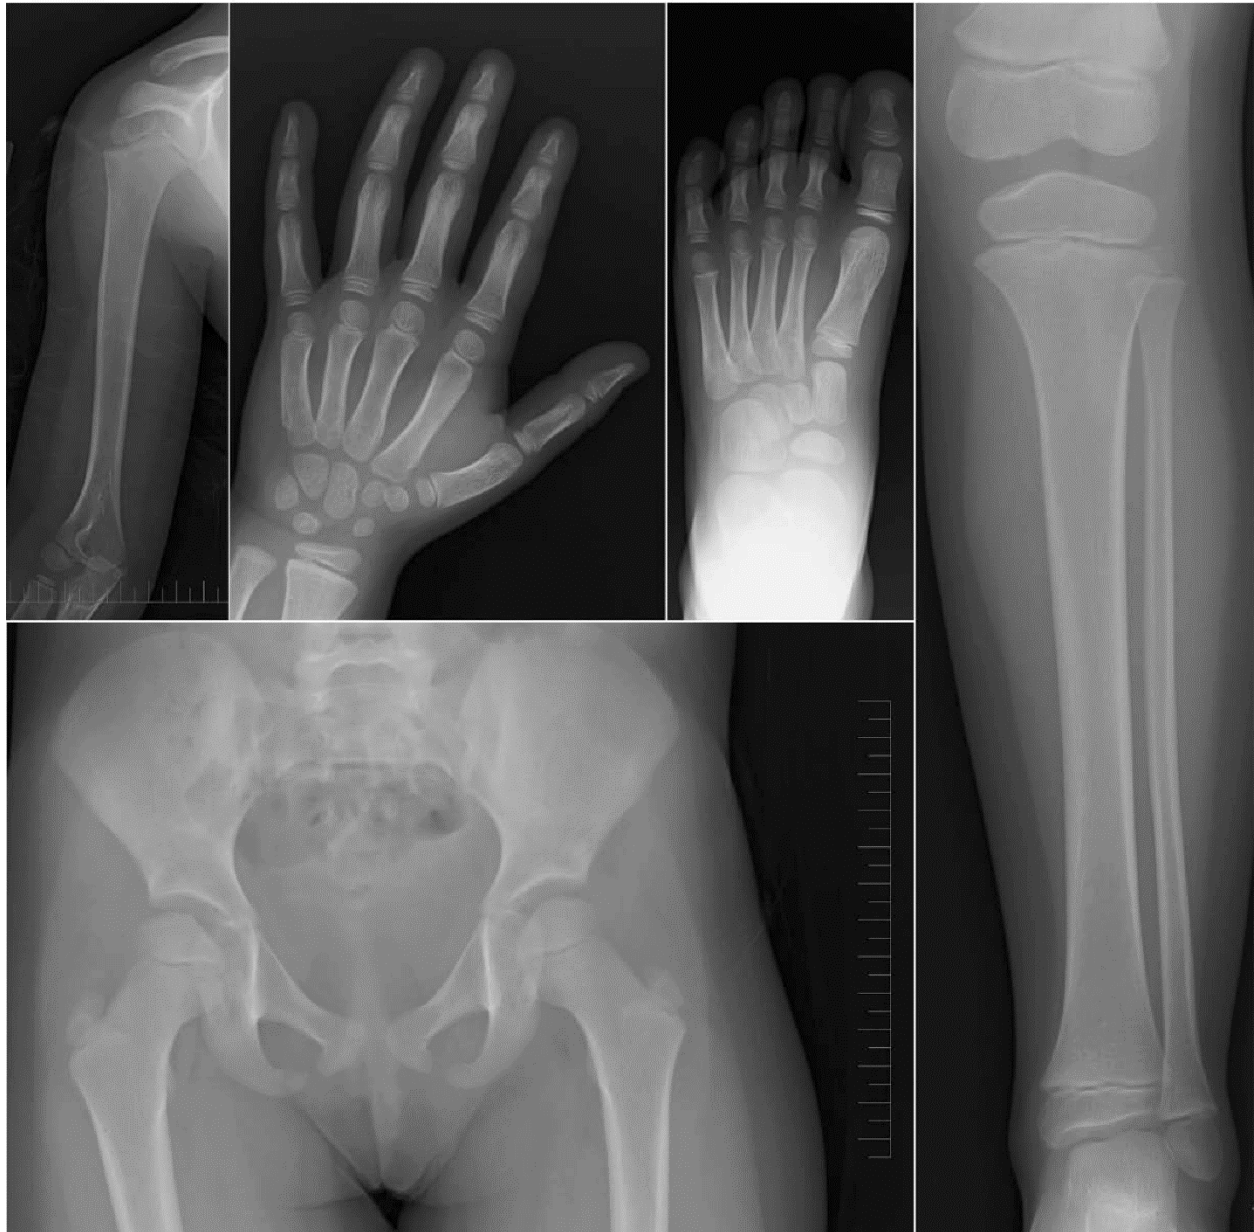

Supplement: jc.2016-3313_Supplemental_Data.pdf [file jc.2016-3313_Supplemental_Data.pdf]
